# Supplementary material for: Inhibition of PTP1B blocks pancreatic cancer progression by targeting the PKM2/AMPK/mTOC1 pathway
Source: PubMed Central journal article supplement (PMC6864061; doi:10.1038/s41419-019-2073-4), 2019-11-19

# Supplementary Fig. 1

**A**

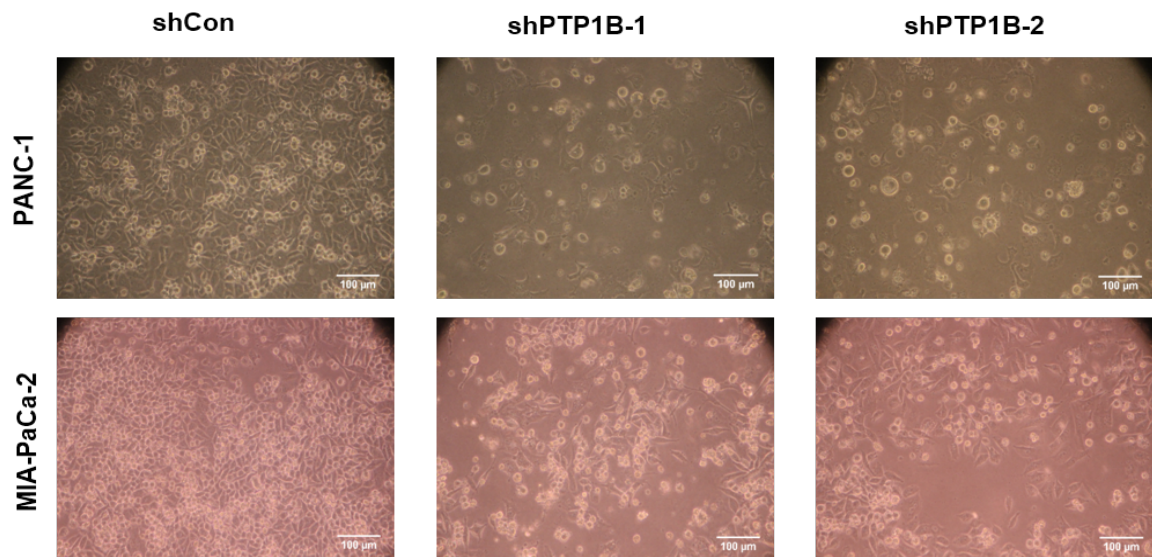

**B**

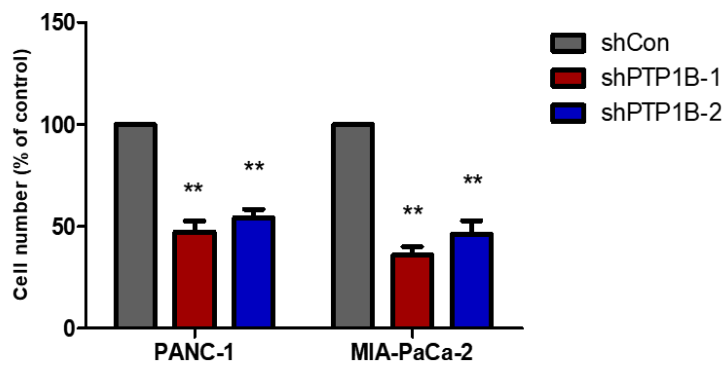

Supplement: 41419_2019_2073_MOESM4_ESM.pdf [file 41419_2019_2073_MOESM4_ESM.pdf]
